# Supplementary material for: Solvent-engineering toward CsPb(IxBr1−x)3films for high-performance inorganic perovskite solar cells
Source: Royal Society of Chemistry journal article supplement (doi:10.1039/c8ta07968d), 2018-01-01
Supplement: c8ta07968d1.pdf [file c8ta07968d1.pdf]

## Supporting information

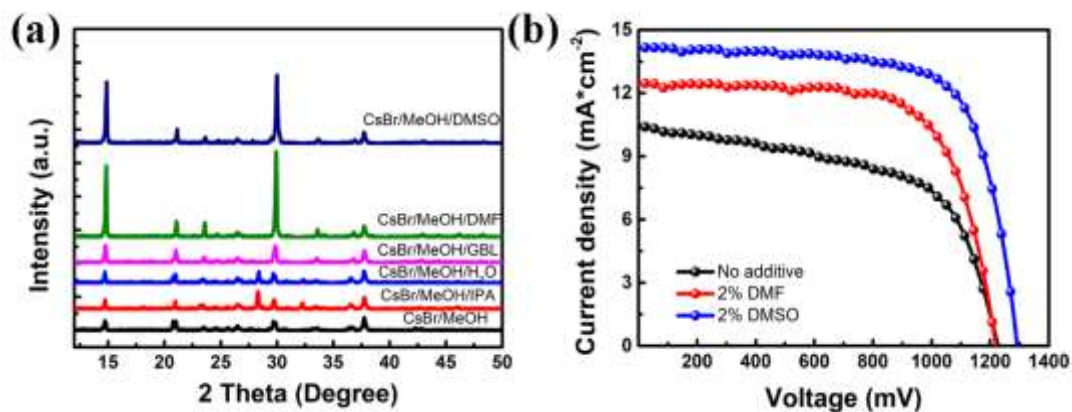

**Fig. S1.** (a) XRD patterns of the CsPb(I<sub>x</sub>Br<sub>1-x</sub>)<sub>3</sub> films prepared by adding various solvent additives into CsBr/MeOH solutions. (b) Current density–voltage (J–V) curves of the CsPb(I<sub>x</sub>Br<sub>1-x</sub>)<sub>3</sub> solar cells prepared by incorporation of DMF, DMSO and no additives to the CsBr/MeOH solutions .

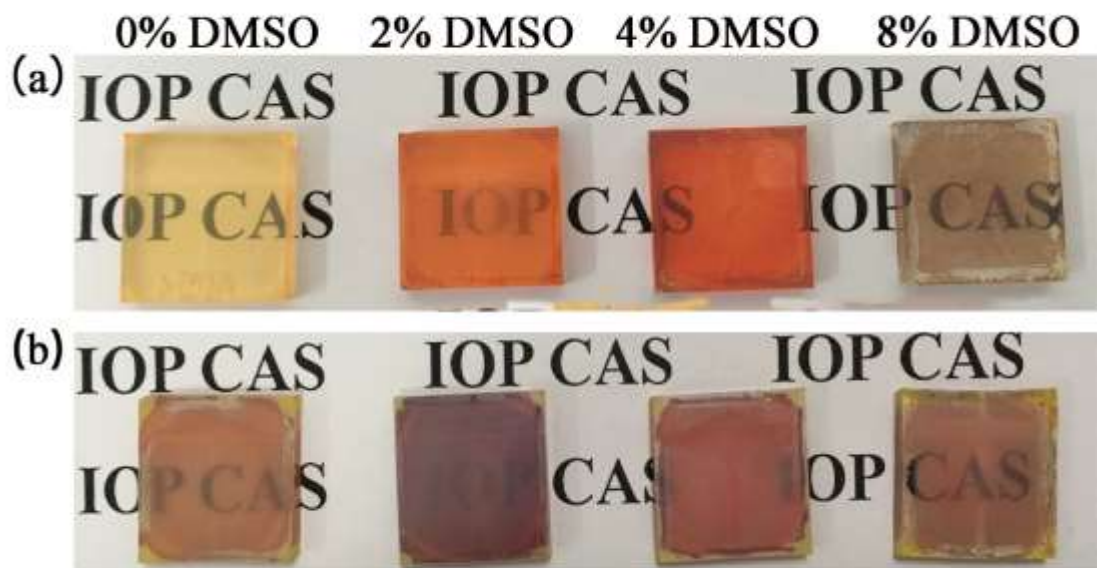

**Fig. S2.** Photographs of the  $\text{CsPb}(\text{I}_x\text{Br}_{1-x})_3$  films prepared by different amounts of DMSO in CsBr/MeOH solutions, (a) before annealing and (b) after annealing.

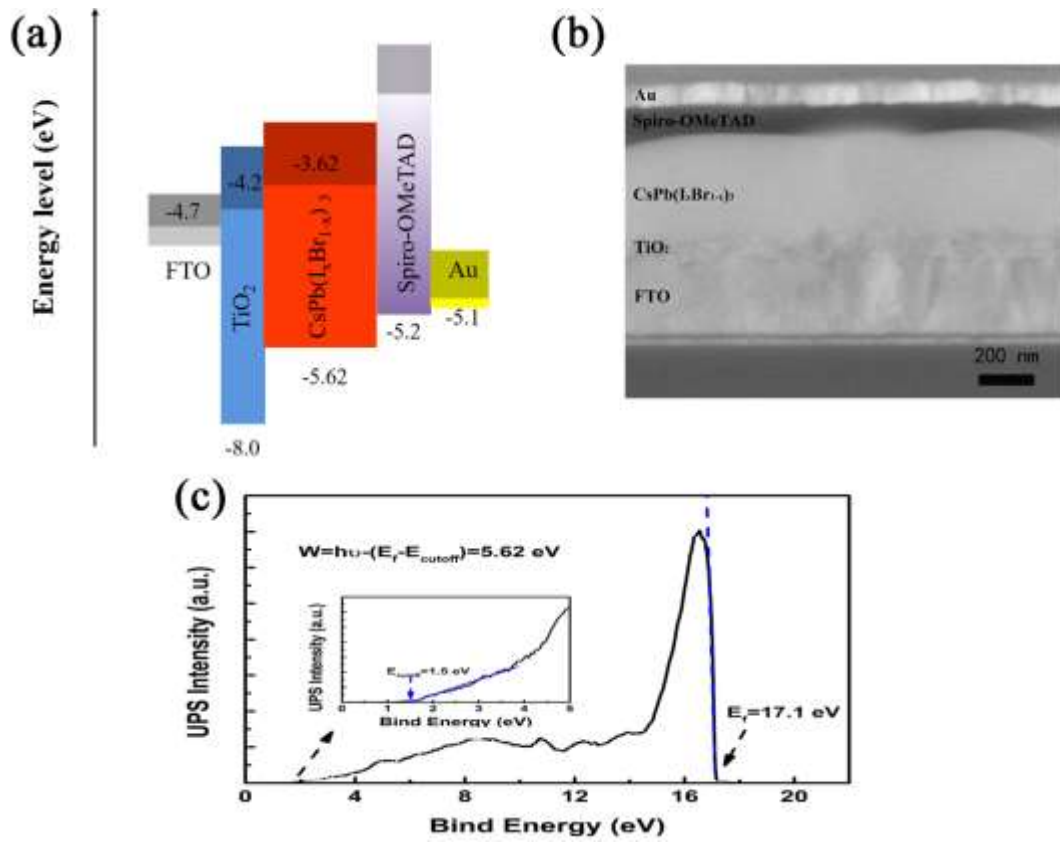

**Fig. S3.** (a) The energy level diagram and (b) the cross-sectional SEM image of the fabricated device with a structure FTO/bl- $\text{TiO}_2$ /mp- $\text{TiO}_2$ / $\text{CsPb}(\text{I}_x\text{Br}_{1-x})_3$ /spiro-OMeTAD/Au. The UPS spectra of the  $\text{CsPb}(\text{I}_x\text{Br}_{1-x})_3$  film.

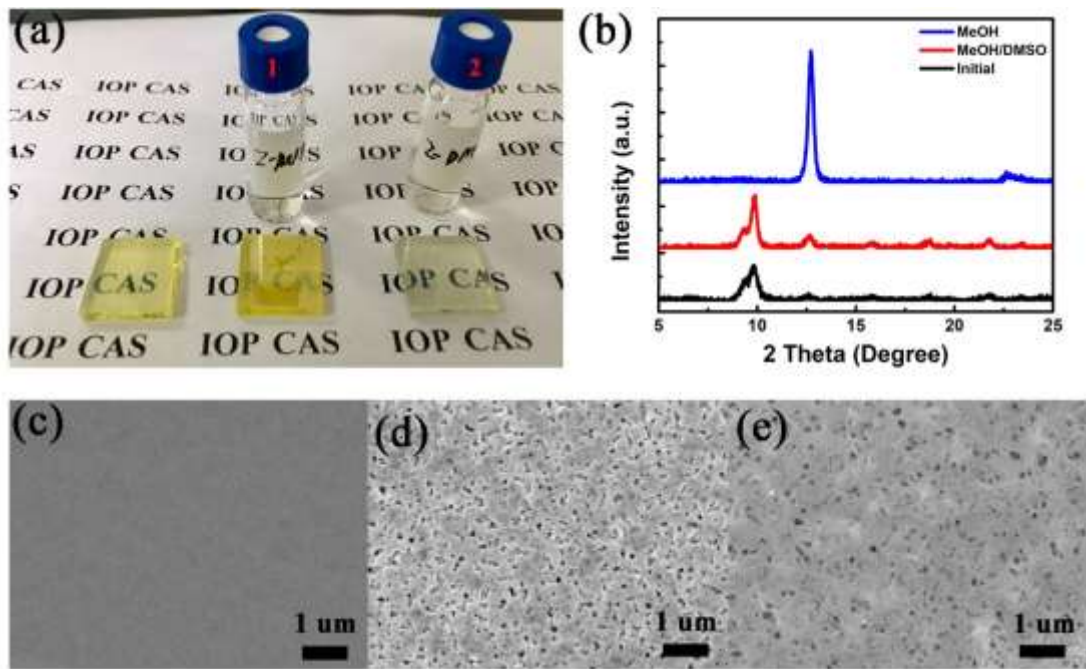

**Fig. S4.** (a) Photographs and (b) XRD patterns of the initial  $\text{PbI}_2/\text{PbBr}_2$  films, after MeOH solutions wash and after MeOH/DMSO (2 wt%) solutions wash, (c-e) the top-down SEM images of  $\text{PbI}_2/\text{PbBr}_2$  after different treatment, (c) initial, (d) after MeOH solutions wash, (e) after MeOH/DMSO (2 wt%) solutions wash.

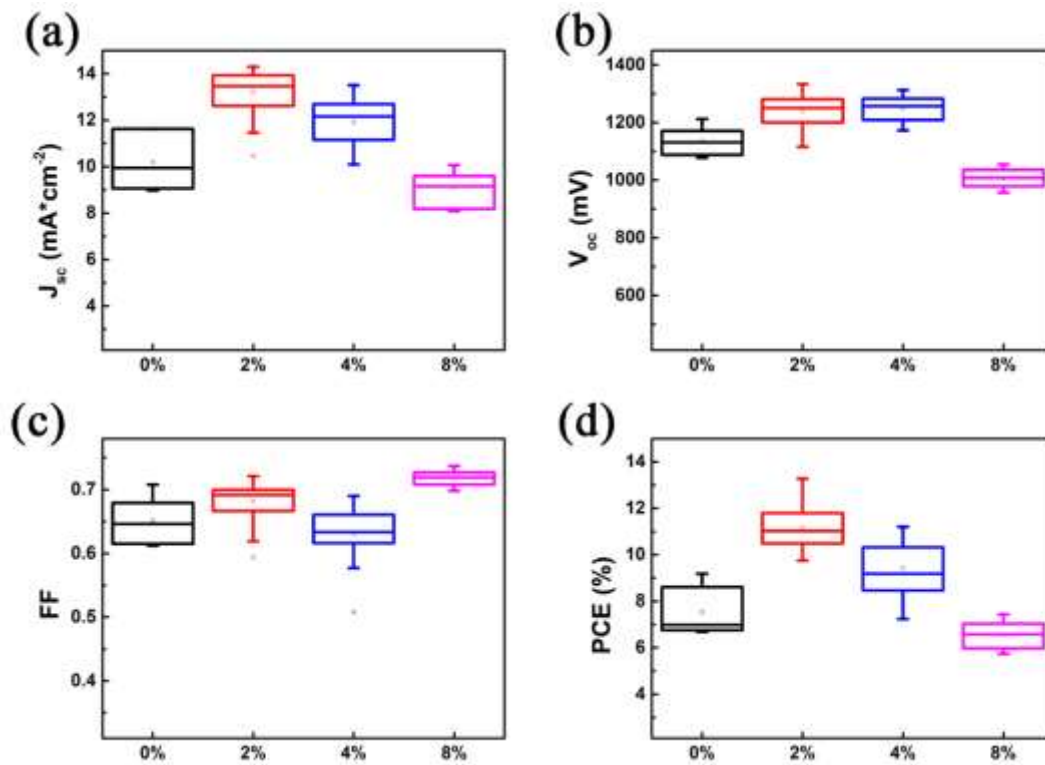

**Fig. S5.** Statistical results of J-V characteristics of perovskite solar cells prepared with 0, 2, 4 and 8% volume of DMSO in two-step multicycle spin-coating process. (a)  $J_{sc}$  ( $\text{mA}\cdot\text{cm}^{-2}$ ), (b)  $V_{oc}$  (mV), (c) FF, (d) PCE(%).

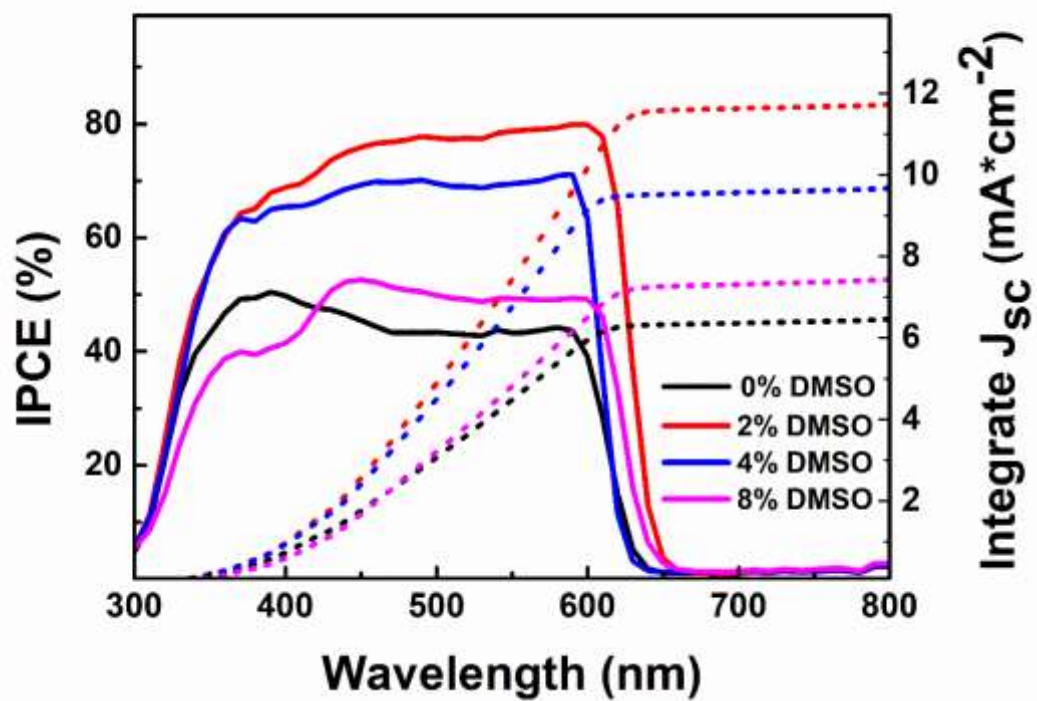

**Fig. S6.** IPCE and integrate  $J_{sc}$  of the  $CsPb(I_xBr_{1-x})_3$  devices prepared by different amounts of DMSO in CsBr/MeOH solutions..

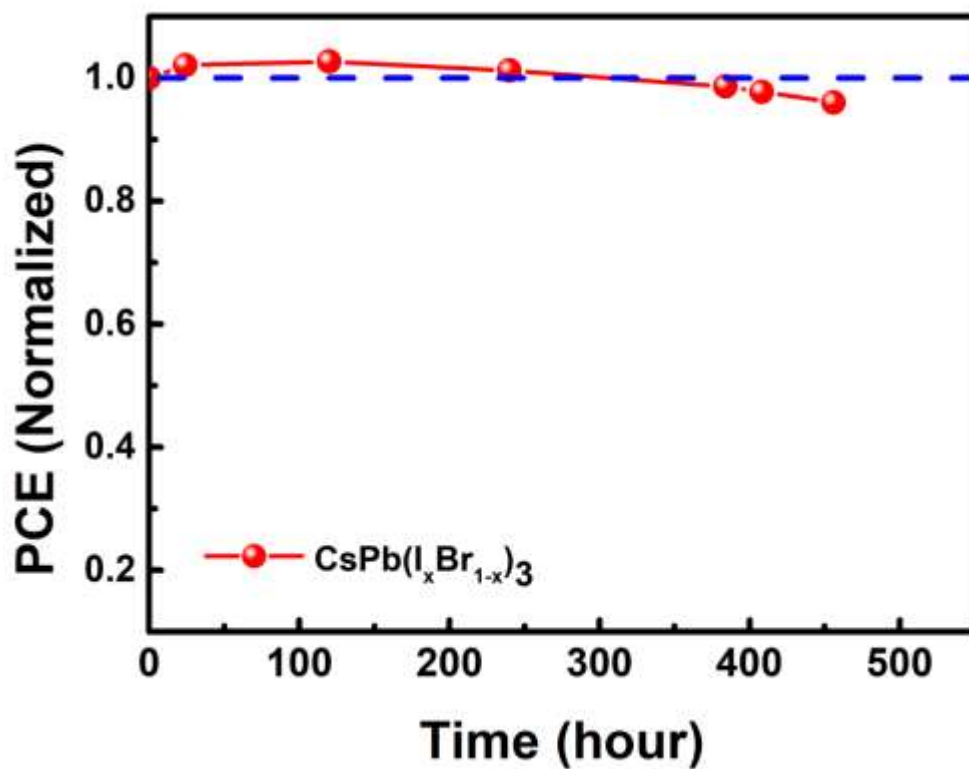

**Fig. S7.** The normalized PCE of the  $\text{CsPb}(\text{I}_x\text{Br}_{1-x})_3$  devices as a function of the storage time. All the devices were measured in the ambient air and without encapsulation.

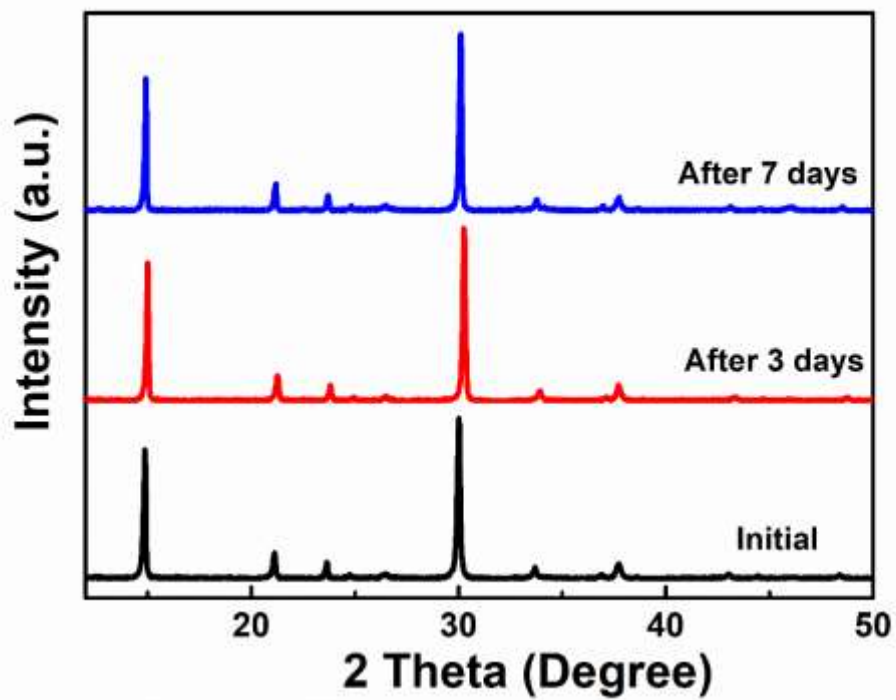

**Fig. S8.** XRD patterns evolution of the CsPb(I<sub>x</sub>Br<sub>1-x</sub>)<sub>3</sub> perovskite films heated on a 80°C hotplate in air with a controlled humidity environment with <20% RH.
